# Supplementary material for: The complete chloroplast genome sequences of three Spondias species reveal close relationship among the species
Source: PubMed Central journal article supplement (PMC6428118; doi:10.1590/1678-4685-gmb-2017-0265), 2019-03-11
Supplement: 1415-4757-GMB-1678-4685-GMB-2017-0265-20170265-suppl2.pdf [file 1415-4757-GMB-1678-4685-GMB-2017-0265-20170265-suppl2.pdf]

**Supplementary Material to “The complete chloroplast genome sequences of three *Spondias* species reveal close relationship among the species”**

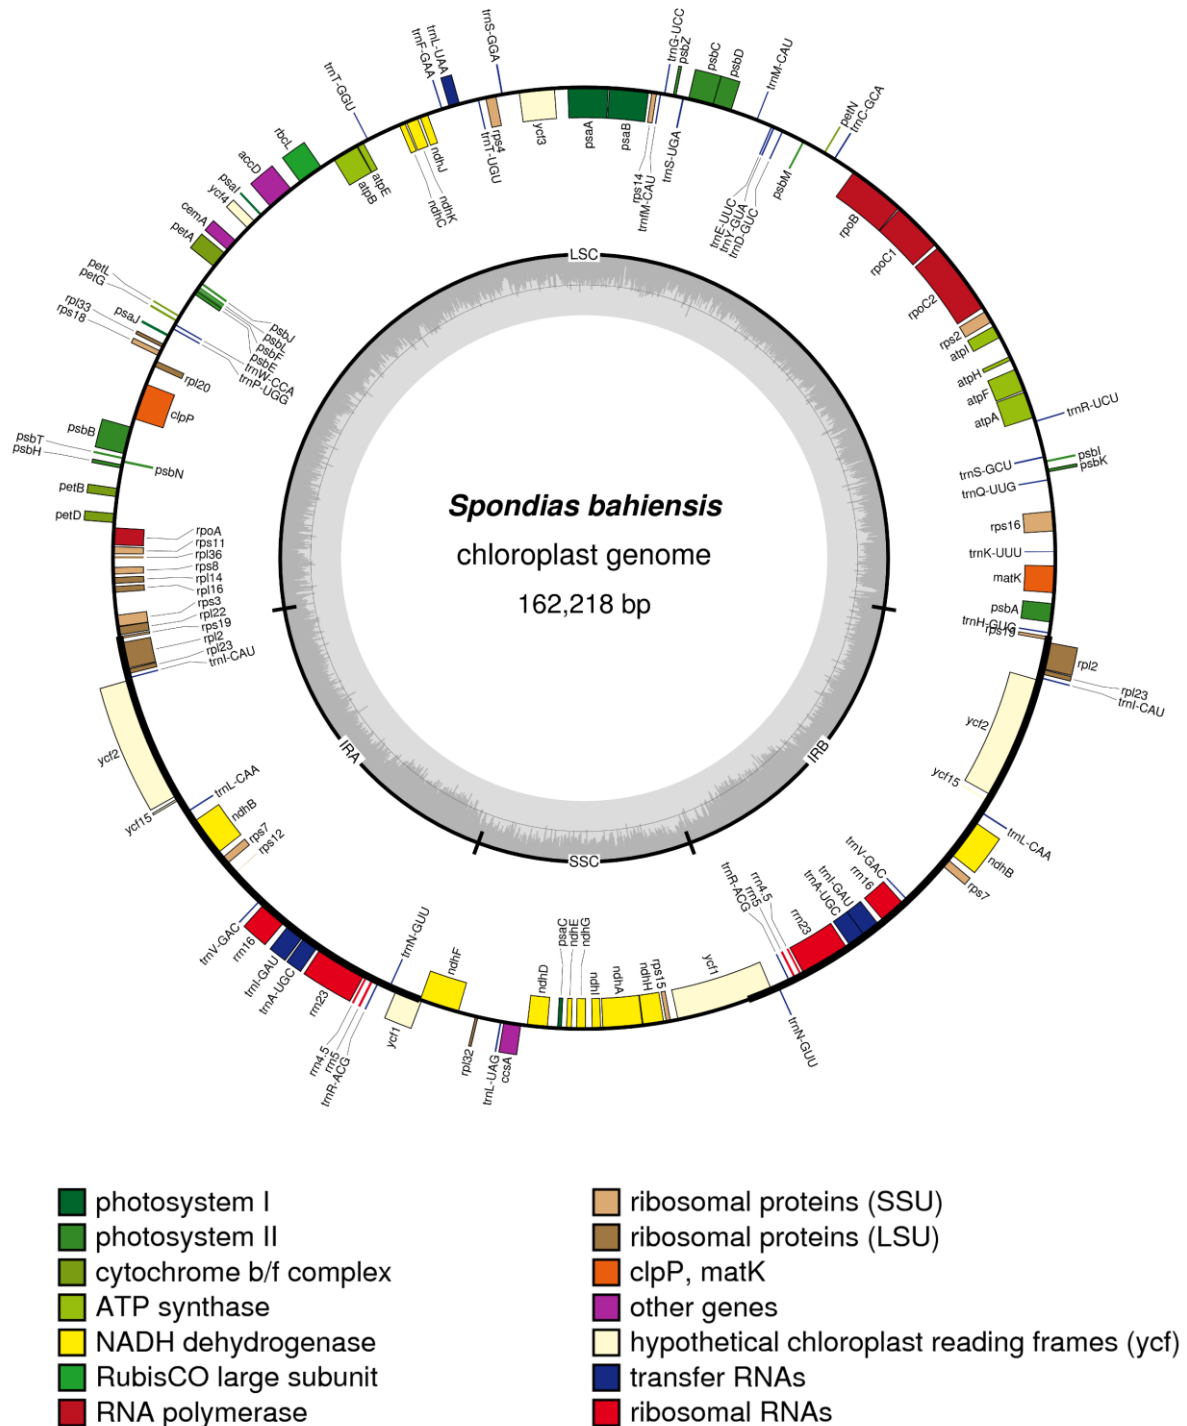

**Figure S2** - Chloroplast genome map of *S. bahiensis*. Annotated genes are colored according to the functional categories as described in the legend. Genes on the inside are transcribed in a clockwise direction and genes in the outside are transcribed in a counterclockwise direction. LSC: large single copy region; SSC: small single copy region; IRA; IRB: inverted repeats. The inside gray circle represents the C+G content.
